# Supplementary material
Source: PubMed Central journal article supplement (PMC2748906)
Supplement: NIHMS130139-supplement-01.pdf [file NIHMS130139-supplement-01.pdf]

## Supplemental Data

**Supplemental Fig. 1**

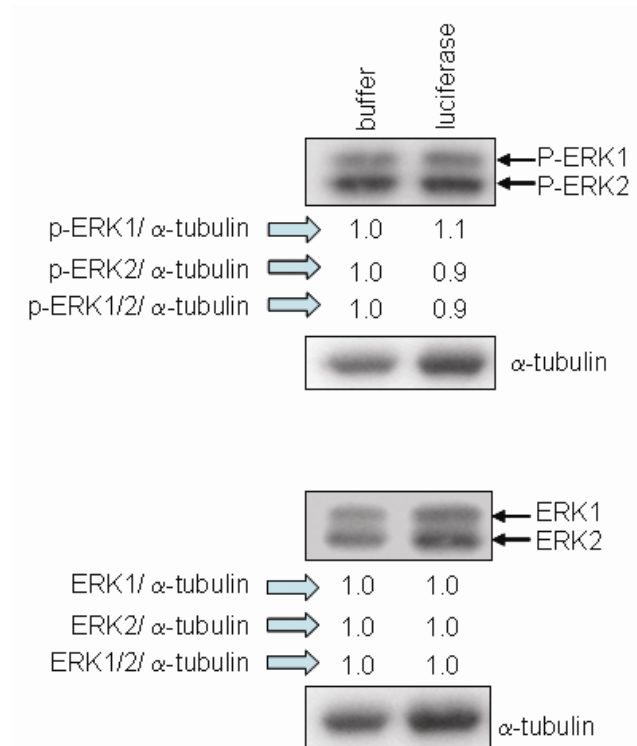

**Suppl. Fig. 1 Luciferase control siRNA transfection does not alter protein expression level of p-ERK1/2 and ERK1/2 in HLFs.** Transfection with either luciferase control siRNA at 1.5 nmole or 1X siRNA buffer was performed as described in Fig.1 and expression of p-ERK1/2 and ERK1/2 was examined by immunoblotting on protein lysates isolated from transfected HLFs at 72 hr post-transfection. One representative blot from 2 experiments is shown and densitometric analyses on p-ERK1, p-ERK2, p-ERK1/2, ERK1, ERK2, and ERK1/2 are shown as numbers under the blot for indicated protein after normalization by  $\alpha$ -tubulin level.

## Supplemental Fig. 2

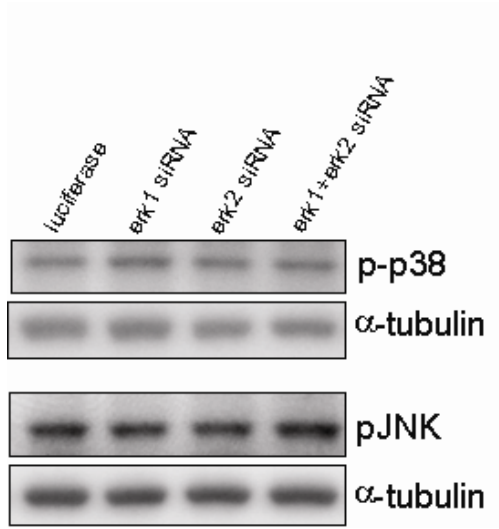

**Suppl. Fig. 2 Level of activating phosphorylation of p38 and JNK was not altered after ERK silencing in HLFs.** Transfection was carried out as described in Fig.1 and expression of p-p38(thr180/tyr182) and p-JNK (thr183/tyr185) was examined by immunoblotting on protein lysates isolated from transfected HLFs with indicated siRNA at 72 hr post-transfection.

### Supplemental Fig. 3

(A)

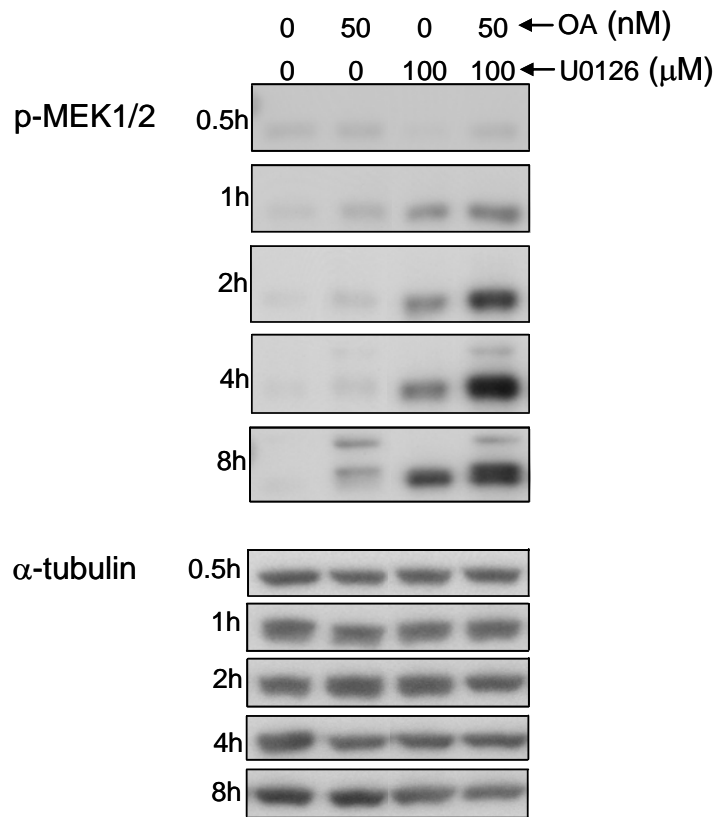

(B)

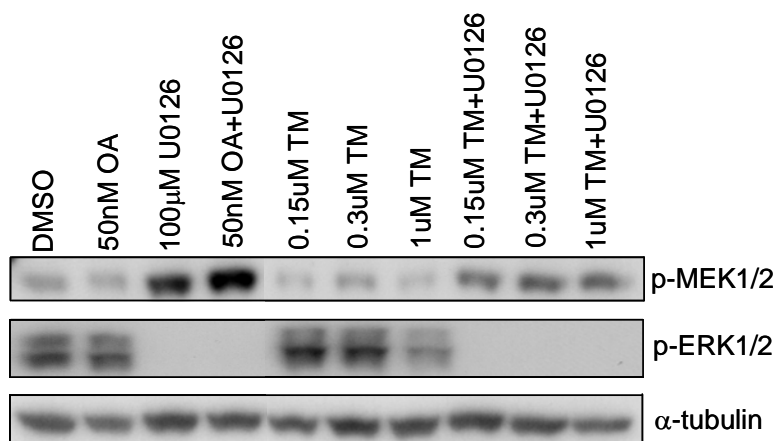

**Suppl. Fig. 3 Protein phosphatase 2A is involved in MEK hyperactivation after MEK**

**inhibitor treatment in untransfected HLFs.** (A) HLFs at 24 hr post-seeding were treated with 50 nM OA, or 100  $\mu$ M U0126 alone or in combination for 0.5, 1, 2, 4, or 8 hr, and then protein lysates were isolated for immunoblotting of p-MEK1/2(ser217/221). Similar results were obtained in two independent experiments. (B) HLFs at 24 hr post-seeding were pre-treated with OA or TM at indicated concentration for 0.5 hr and then 100  $\mu$ M U0126 was added for 2 hr before isolation of protein lysates for immunoblotting of p-MEK1/2 and p-ERK1/2. Similar results were obtained in two independent experiments.
